# Supplementary material for: Genome Diversity, Recombination, and Virulence across the Major Lineages of Paracoccidioides
Source: PubMed Central journal article supplement (PMC5040785; doi:10.1128/msphere.00213-16), 2016-09-28

Ref: Pb18 (S1b)  
Total 641,570 nt

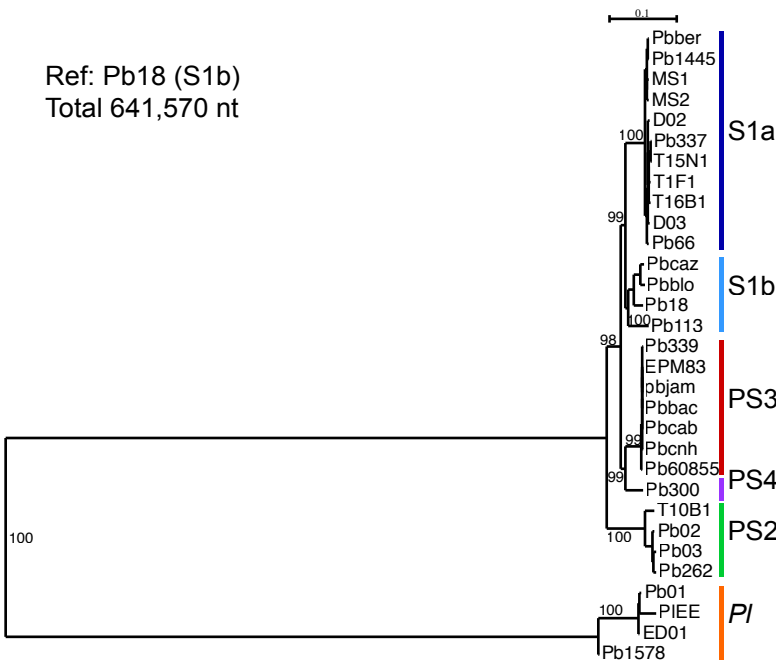

Ref: Pb03 (PS2)  
Total 537,144 nt

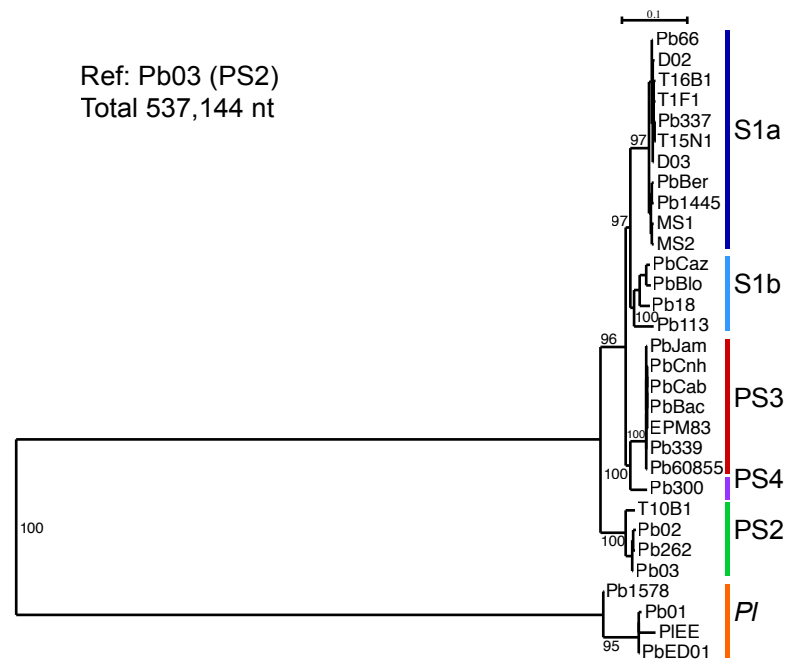

Ref: PbCNH (PS3)  
Total 619,481 nt

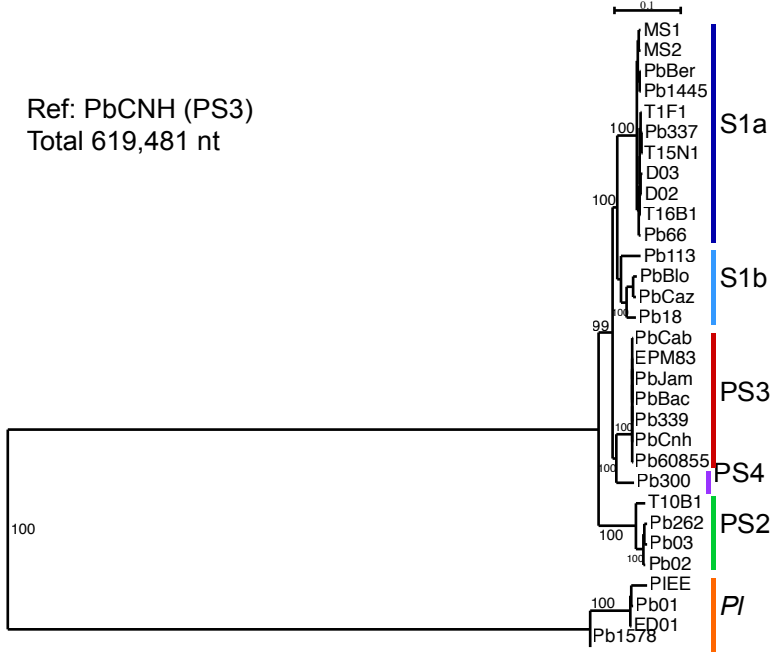

Ref: Pb300 (PS4)  
Total 615,484 nt

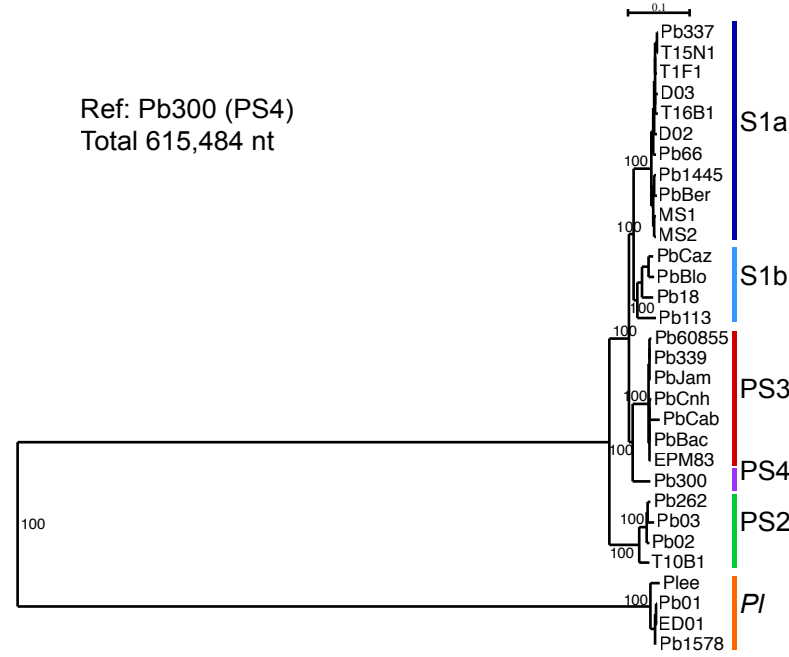

Ref: Pb01 (PI)  
Total 708,402 nt

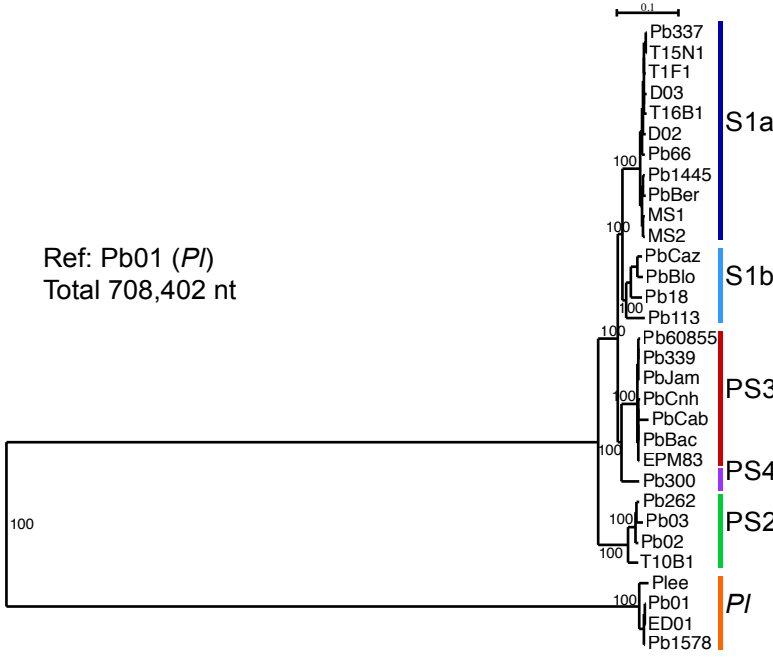

Supplement: sph005162156sf4.pdf [file sph005162156sf4.pdf]
