# Supplementary material for: Genome Diversity, Recombination, and Virulence across the Major Lineages of Paracoccidioides
Source: PubMed Central journal article supplement (PMC5040785; doi:10.1128/msphere.00213-16), 2016-09-28

A

*Paracoccidioides* spp.*P. brasiliensis*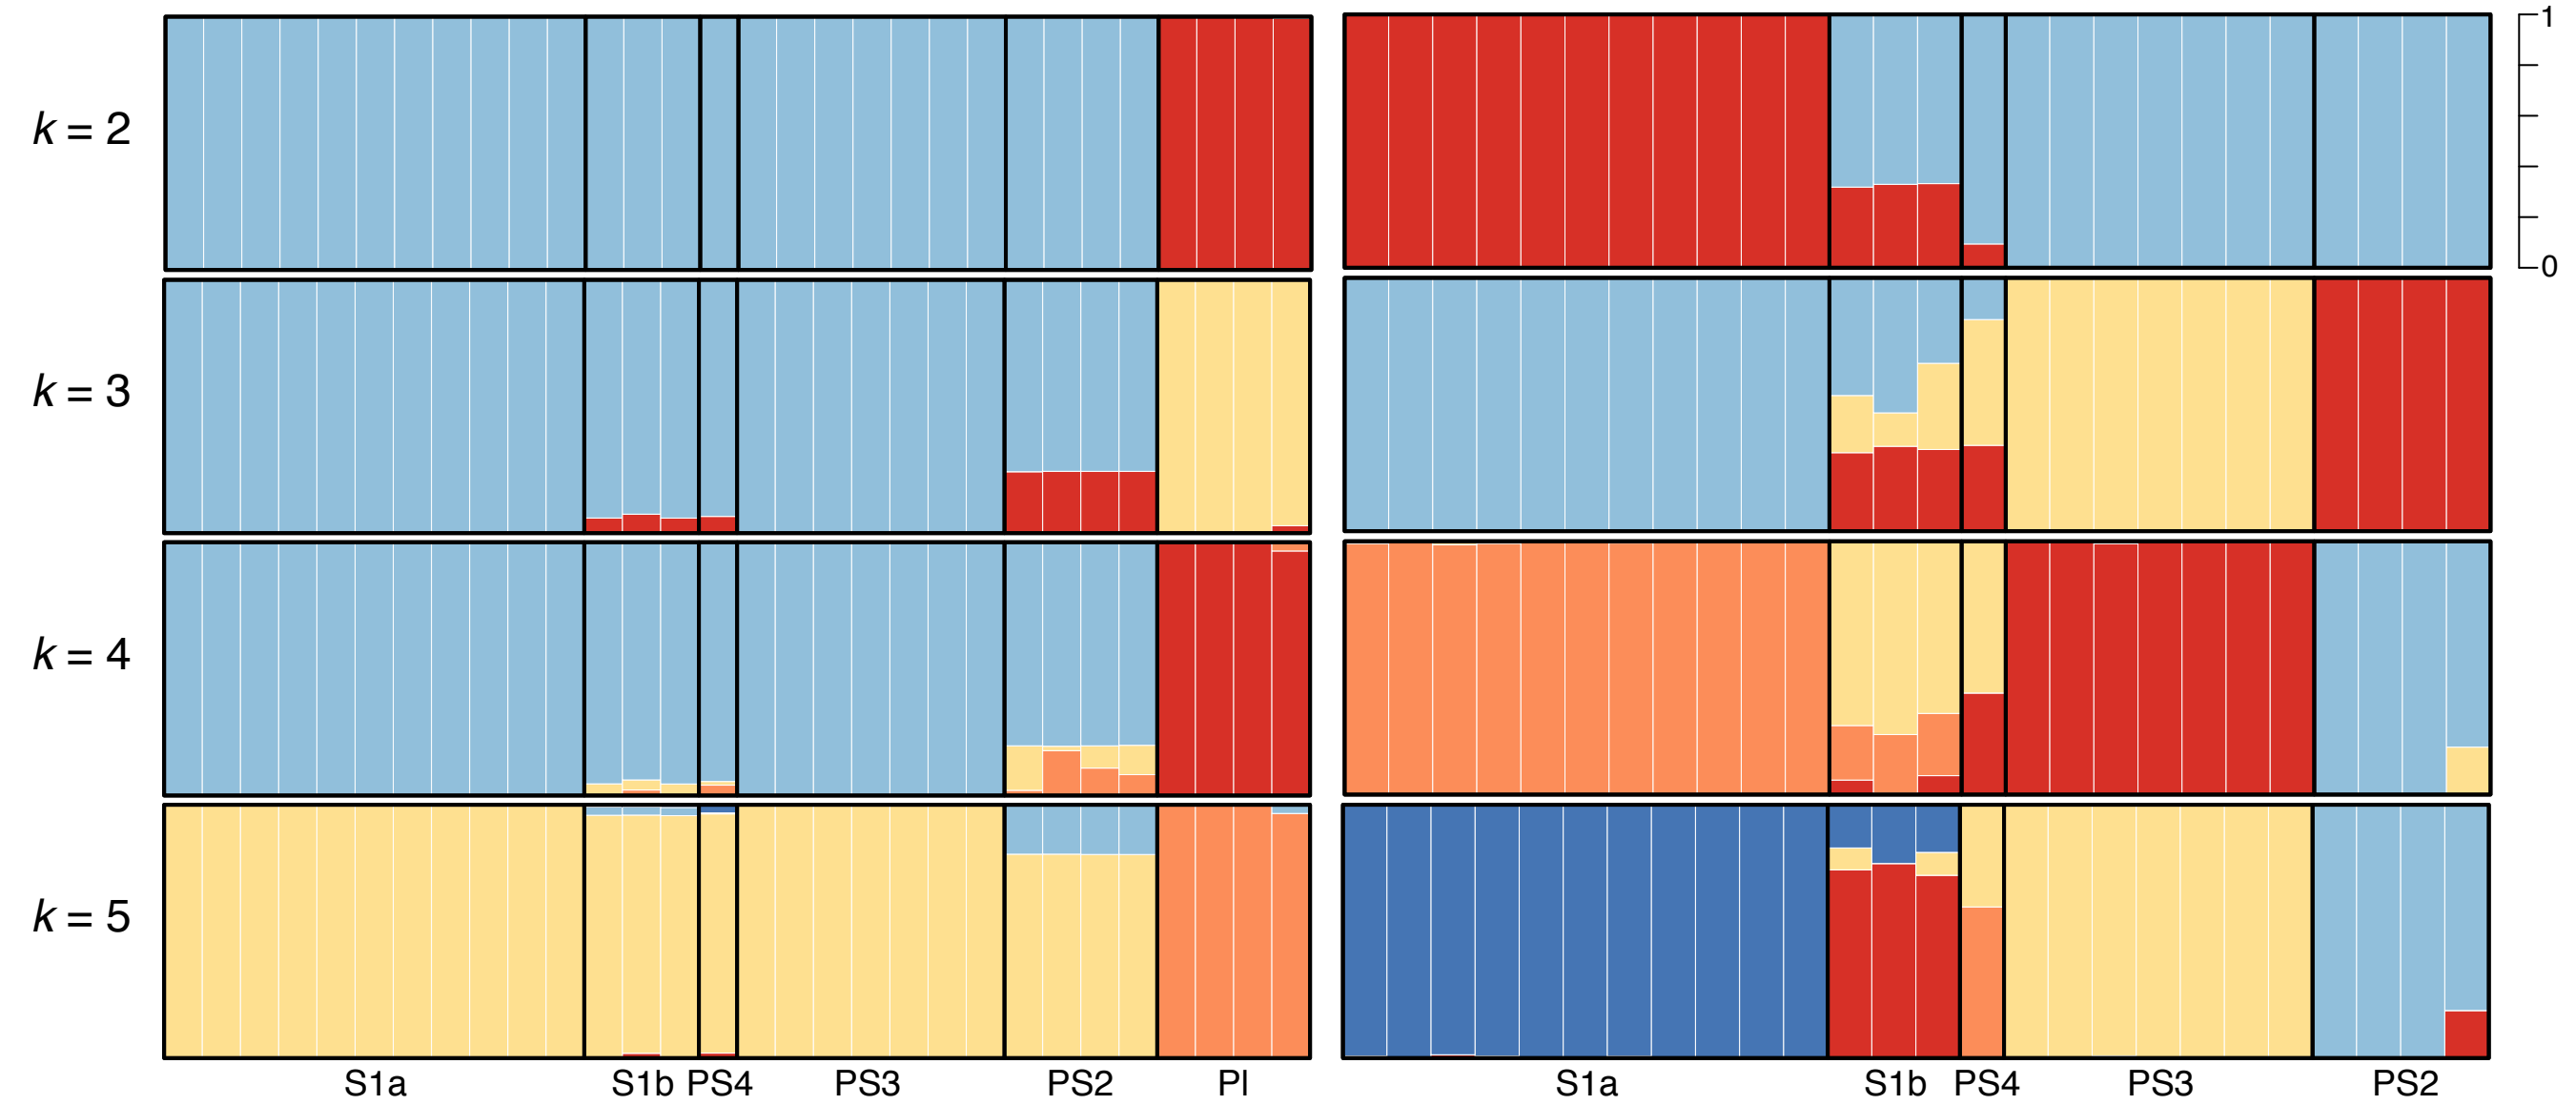

B

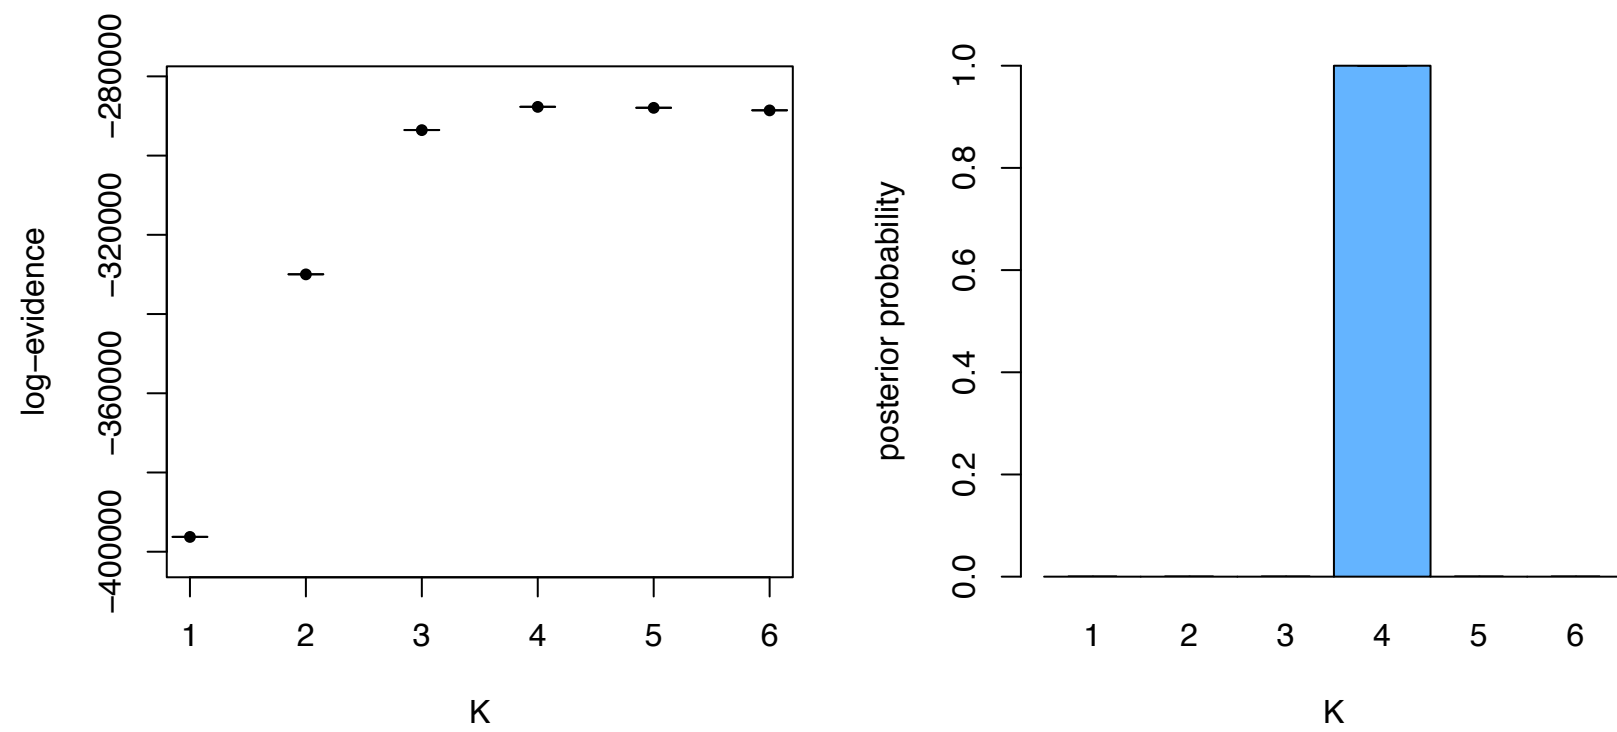

Supplement: sph005162156sf6.pdf [file sph005162156sf6.pdf]
